# Supplementary material
Source: PubMed Central journal article supplement (PMC7516364)
Supplement: 10-1055-s-0040-1713152-s200338.pdf [file 10-1055-s-0040-1713152-s200338.pdf]

# Supplementary Material

## Disclosures

B.B. reports that he is a consulting expert, on behalf of the plaintiff, for litigation related to a specific type of IVC filters. M.V.M. reports being supported by an institutional grant by the National Institutes of Health/National Heart, Lung, and Blood Institute to Columbia University Irving Medical Center (T32 HL007854). L.B. reports personal fees and nonfinancial support from Aspen, Bayer, Leo-Pharma, BMS-Pfizer, and nonfinancial support from Daiichi, outside the submitted work. D.J. reports no conflicts of interest. W.A. has received honoraria from Boehringer Ingelheim, Bayer Pharmaceuticals, BMS-Pfizer, Daiichi-Sankyo, Aspen, Sanofi, Portola, and Janssen. Research support from Bayer Pharmaceuticals. E.P.D. receives consulting fees from Sanofi and Leo. K.S. has no disclosures. S.S. reports honoraria from Janssen and Chiesi, Inc. I.Q. has received honoraria as a speaker from Bayer Pharmaceuticals, BMS-Pfizer, Leo Pharma, and Aspen. E.J.F. has nothing to disclose. A.J.T: Recovery Force: Consultancy; Janssen: Other: Educational Grants, Research Funding; BMS: Research Funding; Idorsia: Research Funding; Daiichi Sanyo: Research Funding; Stago: Research Funding; Doasense: Research Funding. J.F. has no disclosures. M.C. has nothing to disclose. J.W.E. has received consulting fees and/or honoraria and grants and/or in-kind support from Astra-Zeneca, Bayer, Boehringer-Ingelheim, Bristol-Myer-Squibb, Daiichi-Sankyo, Eli-Lilly, Glaxo-Smith-Kline, Pfizer, Janssen, Sanofi-Aventis, and Servier. C.M.G. reports grants and personal fees from Portola, grants and personal fees from Johnson grants and personal fees from Angel Medical Corporation, personal fees from Bayer Corp., grants and personal fees from CSL Behring, grants and personal fees from Janssen Pharmaceuticals, grants and personal fees from Johnson no speaking/consulting fees were personally received. Personal: Travel Expenses/

Meals from Medtronic, Boston Scientific, Abbott Vascular, Abiomed, CSI, CathWorks, Siemens, Philips, ReCor Medical, Chiesi, OpSens, Zoll, and Regeneron. G.W.S. has received speaker or other honoraria from Cook, Terumo, QOOL Therapeutics, and Orchestra Biomed; has served as a consultant to Valfix, TherOx, Vascular Dynamics, Robocath, HeartFlow, Gore, Ablative Solutions, Miracor, Neovasc, V-Wave, Abiomed, Ancora, MAIA Pharmaceuticals, Vectorious, Reva, and Matrizyme; and has equity/options from Ancora, Qool Therapeutics, Cagent, Applied Therapeutics, Biostar family of funds, Spectra-Wave, Orchestra Biomed, Aria, Cardiac Success, MedFocus family of funds, and Valfix. S.Z.G. reports grants from Bayer, grants from Boehringer-Ingelheim, grants from BMS, grants from BTG EKOS, grants from Daiichi Sankyo, grants from Janssen, grants from US National Heart Lung and Blood Institute, grants from Thrombosis Research Institute, personal fees from Bayer, personal fees from Boehringer-Ingelheim, outside the submitted work. S.A.P. reports grants and other from Abbott Vascular, other from Boston Scientific, other from Janssen, other from Medtronic Vascular, other from CSI, other from Philips, grants from Surmodics, grants from TriReme Medical, grants from Shockwave Medical, personal fees from Terumo, personal fees from Abiomed, outside the submitted work. H.M.K. reports personal fees from UnitedHealth, personal fees from IBM Watson Health, personal fees from Element Science, personal fees from Aetna, personal fees from Facebook, personal fees from Siegfried educational grants from Biocompatibles Group UK - Boston Scientific, Daiichi Sankyo; lecture fees from Bayer AG, Pfizer-Bristol-Myers Squibb, MSD, all outside the submitted work. J.I.W. reports serving as a consultant and received honoraria from Bayer, Janssen, JnJ, BMS, Pfizer, Boehringer Ingelheim, Novartis, Daiichi-Sankyo, Merck, Servier, Anthos, Ionis, and PhaseBio.
